# Supplementary material for: Evaluating the effects of organizational and educational interventions on adherence to clinical practice guidelines in a low-resource primary-care setting in Kenya
Source: Oxford University Press journal article supplement (doi:10.1093/heapol/czx004), 2017-01-30
Supplement: czx004_Supp.docx [file czx004_Supp.docx]

# **Evaluating the effects of organizational and educational interventions on adherence to clinical practice guidelines in a low resource primary care setting in Kenya**

**Appendices [Proposed to be included as *Supplementary Data*]**

**Appendix 1 – Response coding for the 17 clinical quality measures, by medical condition.**

| **1. Urinary Tract Infections** | **Yes = 1** | **No = 0** |
| --- | --- | --- |
| CQM 1: Ask if Vaginal Discharge present |  |  |
| CQM 2: Document Pregnancy Status |  |  |
| CQM 3: Check Temperature |  |  |
| CQM 4: Check for CVA Tenderness |  |  |
| CQM 5: Prescribe Nitro or Document why not |  |  |
| **2. Vaginal Discharge** | **Yes = 1** | **No = 0** |
| CQM 6: Document #partners, protection, past STIs, pregnancy status (4 Ps) |  |  |
| CQM 7: Document findings of Speculum Exam |  |  |
| CQM 8: Check for Cervical Motion Tenderness |  |  |
| CQM 9: Take an Endocervical Swab (HVS) |  |  |
| CQM 10: Prescribe According to Diagnosis |  |  |
| **3. Tonsillitis** | **Yes = 1** | **No = 0** |
| CQM 11: Document Last HIV Test |  |  |
| CQM 12: Use all 4 Centor Criteria correctly |  |  |
| CQM 13: Prescribe According to Centor score |  |  |
| **4. Childhood Diarrhea** | **Yes = 1** | **No = 0** |
| CQM 14: 4 Dehydration Signs Documented (e.g. tears, general condition, mucus membranes, eye sunkenness) |  |  |
| CQM 15: Document 6 Vital Signs Documented (e.g. heart rate, temperature, respiratory rate, blood pressure, height, weight) |  |  |
| CQM 16: Prescribe Appropriate Rehydration |  |  |
| CQM 17: Prescribe Zinc Supplementation |  |  |

**Appendix 2 – Clinical encounter inclusion criteria, by medical condition.**

| **CONDITION** | **Filters** | **CHIEF COMPLAINTS** | **INVESTIGATIONS** | **DIAGNOSIS** | **MEDICATION** |
| --- | --- | --- | --- | --- | --- |
| **Urinary Tract Infections (UTI)** |  | Dysuria  Painful micturation  Painful urination  Bloody urine  Lower abdominal pain  Passing concentrated urine  Passing blood in the urine | Urinalysis | Cystitis  Clinical UTI  LUTI  UTI  UUTI  UTI in Pregnancy |  |
| **Vaginal Discharge** | Females only | PV Discharge | High Vaginal Swab | Candidiasis  Vaginal Candidiasis  Sexually Transmitted Infection  Cervicitis  Vaginitis  Trichomoniasis  Bacterial Vaginosis  Gonorrhea |  |
| **Tonsillitis** |  | Painful swallowing  Sore throat  Throat pain |  | Tonsillitis  Pharyngitis  Viral tonsillitis |  |
| **Childhood Diarrhoea** | < = 5yrs old at time of visit (Visit Date Year – Birthday Year) | Diarrhoea  Loose stool | Stool Analysis  Salmonella Antigen Test | Enteritis  Gastritis  Gastro-enteritis  Dehydration | Zincat  Zinc Sulphate  Oral Rehydration Salts  Dyrade M |
| **URTI** |  | Cough  Difficulty in breathing  Nasal congestion  Nasal discharge  Sneezing  Running nose  Nasal blockage |  | Rhinitis  *Acute Bacterial Sinusitis*  URTI  Viral URTI  Pneumonia  LRTI  TB (tuberculosis)  Bronchitis  Bronchiolitis |  |
